# Supplementary material
Source: MDPI journal article supplement (https://www.mdpi.com/2306-5338/10/4/85)
Supplement: s1 [file s1]

Supplementary material:

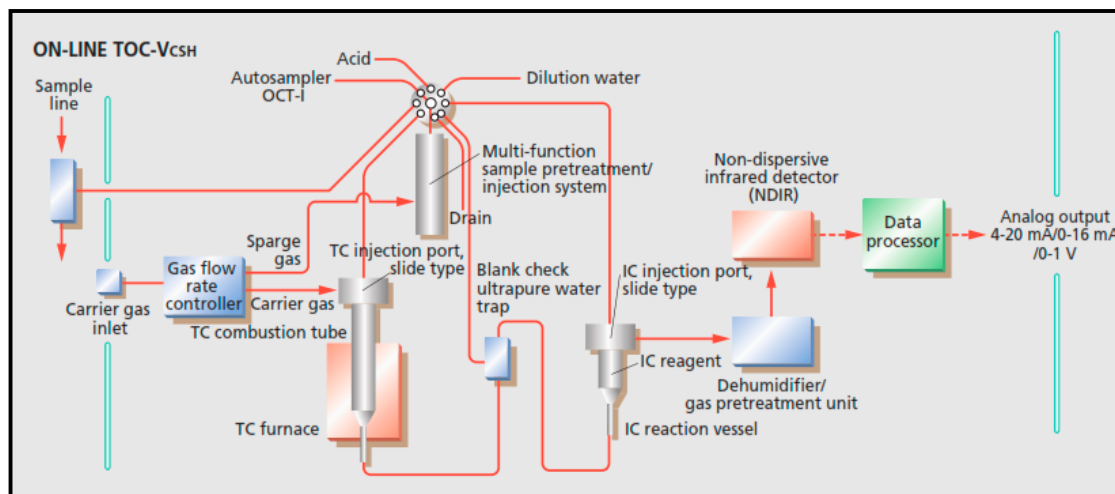

**Figure S1.** Flow chart for DOC analysis in TOC –VCSH (after user manual TOC –VCSH/CPN)

**Table S2.** Analytical methods for all parameters

| Parameters                      | Instruments                   | Instruments model                          | Method                                                                                  |
|---------------------------------|-------------------------------|--------------------------------------------|-----------------------------------------------------------------------------------------|
| pH                              | Ion electrode                 | (Thermo Orion five-star mete               | Potentiometric determination by using standard hydrogen electrode.                      |
| EC                              |                               |                                            | Metal electrodes, voltage method                                                        |
| DO                              |                               |                                            | Membrane Electrode method                                                               |
| Ca                              |                               |                                            | EDTA Titrimetric method                                                                 |
| Mg                              | Volumetric methods            | Titration using Burette, Flasks            | Calculation method                                                                      |
| Cl                              |                               |                                            | Argentometric method                                                                    |
| HCO <sub>3</sub>                |                               |                                            |                                                                                         |
| SO <sub>4</sub>                 |                               |                                            |                                                                                         |
| PO <sub>4</sub>                 | Spectrophotometer             | HACH (DR 6000)                             | Turbidity method                                                                        |
| NO <sub>3</sub>                 |                               |                                            | Ascorbic acid method                                                                    |
| H <sub>4</sub> SiO <sub>4</sub> |                               |                                            | UV-spectrophotometric screening method                                                  |
| Na and K                        |                               |                                            | Molybdosilicate method.                                                                 |
| DOC                             | Flame photometer              | Elico CL 378                               | Flame emission photometric method                                                       |
| Mn and Fe                       |                               |                                            | Combustion catalytic oxidation/NDIR method                                              |
|                                 | Total organic carbon analyser | TOC-VCSH,                                  |                                                                                         |
|                                 |                               |                                            |                                                                                         |
|                                 | ICPMS                         | ELAN DRC II, Perkin Elmer Sciex Instrument |                                                                                         |
|                                 |                               |                                            | Argon based, high temperature radio frequency plasma usually via pneumatic nebulization |
